# Supplementary material for: Deep mutational scanning reveals pharmacologically relevant insights into TYK2 signaling and disease
Source: eLife. 2026 Jun 10;15:RP110149. doi: 10.7554/eLife.110149 (PMC13252953; doi:10.7554/eLife.110149)
Supplement: Supplementary file 2. — OR, odds ratio; FG, FinnGen; UKBB, UK Biobank; PMID, PubMed Identifier. p-value of phenotype association with P1104A allele (see Materials and methods). PMID for FinnGen: 36653562; PMID for UKBB: 30305743. [file elife-110149-supp2.xlsx]

## Sheet: Supplementary File 2
Supplementary File 2: PheWAS Data Sources and Disease Codes. OR, Odds Ratio; FG, FinnGen; UKBB, UK BioBank; PMID, PubMed Identifier. P-value of phenotype association with P1104A allele (See Methods). PMID for FinnGen: 36653562; PMID for UKBB: 30305743.
Disease	Cases	Data Sources	OR	P-value
Primary Billiary Cholangitis (PBC)	1128	FG, UKBB	0.5	3.2e-07
Systemic Lupus Erythematosus (SLE)	13308	FG, UKBB, PMID: 28714469	0.55	4.3e-24
Psoriatic Arthropathies (PsA)	5497	FG, UKBB	0.62	1e-14
Psoriasis (Pso)	33824	FG, UKBB, PMID: 23143594	0.7	1.3e-40
Sarcoidosis (Sarc)	6760	FG, UKBB	0.7	7.1e-11
Rheumatoid Arthritis (RA)	35548	FG, PMID: 24390342	0.71	1.5e-35
Crohn’s disease (CD)	10133	FG, UKBB, PMID: 26192919	0.77	2.1e-18
Sjogren’s (Sjo)	4300	FG, UKBB	0.78	9.6e-05
Multiple Sclerosis (MS)	19266	FG, UKBB, PMID: 31604244	0.83	3.3e-13
Systemic Sclerosis (SSc)	8257	FG, UKBB, PMID: 26338038	0.84	0.0039
Hypothyroidism (HT)	81718	FG, UKBB	0.85	1.2e-24
Ulcerative Colitis (UC)	17165	FG, UKBB, PMID: 26192919	0.88	5.7e-07
Ankylosing Spondylitis (AS)	4333	FG, UKBB	0.92	0.21
Alopecia Areata (Alo)	4945	FG, UKBB, PMID: 25608926	0.93	0.29
Cardiovascular disease (CVD)	247538	FG	0.95	0.00014
Venous Thromboembolism (VTE)	39606	FG, UKBB	1.02	0.41
All pneumoniae (Pneu)	78791	FG	1.07	7.4e-05
External ear diseases (Ear)	15056	FG	1.12	0.00058
Tonsilitis (Tons)	16717	FG	1.2	9.6e-10
