# Supplementary material for: Deep mutational scanning reveals pharmacologically relevant insights into TYK2 signaling and disease
Source: eLife. 2026 Jun 10;15:RP110149. doi: 10.7554/eLife.110149 (PMC13252953; doi:10.7554/eLife.110149)
Supplement: Supplementary file 3. — PC, principal component. [file elife-110149-supp3.xlsx]

## Sheet: Supplementary File 3
Supplementary File 3: DMS protein abundance score model fitting and model selection. PC, principal component.
Model Specification	Degrees of freedom	Akaike Information Criterion (AIC)	deltaAIC
Case status ~ PC 1-10 + sex + age + DMS score + P1104A dosage + DMS score *sex	16	205189.82	0.00
Case status ~ PC 1-10 + sex + age + DMS score + P1104A dosage + DMS score *sex + P1104A dosage *sex	17	205191.39	1.56
Case status ~ PC 1-10 + sex + age + DMS score + P1104A dosage	15	205192.66	2.84
Case status ~ PC 1-10 + sex + age + DMS score + P1104A dosage + P1104A dosage *sex	16	205194.21	4.39
Case status ~ PC 1-10 + sex + age + P1104A dosage	14	205195.31	5.48
Case status ~ PC 1-10 + sex + age + P1104A dosage + P1104A dosage *sex	15	205196.85	7.03
Case status ~ PC 1-10 + sex + age + DMS score + DMS score *sex	15	205364.59	174.76
Case status ~ PC 1-10 + sex + age + DMS score	14	205367.40	177.58
Case status ~ PC 1-10 + sex + age (NULL model)	13	205369.77	179.95
