# Supplementary material for: Deep mutational scanning reveals pharmacologically relevant insights into TYK2 signaling and disease
Source: eLife. 2026 Jun 10;15:RP110149. doi: 10.7554/eLife.110149 (PMC13252953; doi:10.7554/eLife.110149)
Supplement: Supplementary file 4. [file elife-110149-supp4.xlsx]

## Sheet: Supplementary File 4
Supplementary File 4: Oligo sequences used in this study
Term	Application
GCCTCCGTCCACGAGCTTGGTAGTAATAAGGGCGACC GGCCGCCACC	Barcode-mapping forward primer, sub-library 1
GCCTCCGTCCACGAGCTTGGTAGTAATAAGGGCGACC GGTATCACTCCTCCTTGC	Barcode-mapping forward primer, sub-library 2
GCCTCCGTCCACGAGCTTGGTAGTAATAAGGGCGACC GATCAGACAGCACAGGG	Barcode-mapping forward primer, sub-library 3
GCCTCCGTCCACGAGCTTGGTAGTAATAAGGGCGACC GGCCAAGAAGACCAGC	Barcode-mapping forward primer, sub-library 4
GCCTCCGTCCACGAGCTTGGTAGTAATAAGGGCGACC CCGTGTGCCACCTG	Barcode-mapping forward primer, sub-library 5
GCCTCCGTCCACGAGCTTGGTAGTAATAAGGGCGACC GAACCCCCAAGCCAG	Barcode-mapping forward primer, sub-library 6
GCCTCCGTCCACGAGCTTGGTAGTAATAAGGGCGACC CTTCGTGTCGCTGGTG	Barcode-mapping forward primer, sub-library 7
GCCTCCGTCCACGAGCTTGGTAGTAATAAGGGCGACC AGTGGCCCAGCGT	Barcode-mapping forward primer, sub-library 8
GCCTCCGTCCACGAGCTTGGTAGTAATAAGGGCGACC ACCAGGAGAAACCTCCAAT	Barcode-mapping forward primer, sub-library 9
GCCTCCGTCCACGAGCTTGGTAGTAATAAGGGCGACC CCTCGTGCCTGGC	Barcode-mapping forward primer, sub-library 10
GCCTCCGTCCACGAGCTTGGTAGTAATAAGGGCGACC ATGTGTGGCTGCGG	Barcode-mapping forward primer, sub-library 11
GCCTCCGTCCACGAGCTTGGTAGTAATAAGGGCGACC GCCCTCTCCAGGGA	Barcode-mapping forward primer, sub-library 12
GCCTCCGTCCACGAGCTTGGTAGTAATAAGGGCGACC CCTCCTGCCCACAG	Barcode-mapping forward primer, sub-library 13
GCCTCCGTCCACGAGCTTGGTAGTAATAAGGGCGACC GGGTCACTTCGGCAAG	Barcode-mapping forward primer, sub-library 14
GCCTCCGTCCACGAGCTTGGTAGTAATAAGGGCGACC CAGCTGGTCATGGAGTAC	Barcode-mapping forward primer, sub-library 15
GCCTCCGTCCACGAGCTTGGTAGTAATAAGGGCGACC GCCGTGCCCGAA	Barcode-mapping forward primer, sub-library 16
GCCTCCGTCCACGAGCTTGGTAGTAATAAGGGCGACC TGCTCAGGGTCAGATGA	Barcode-mapping forward primer, sub-library 17
CCATGAAGCAAGTGTAATGGT ATGCGTCGGCTAGC	Barcode-mapping reverse primer (P5 adapter)
CAAGCAGAAGACGGCATACGAGAT NNNNNNNN GCCTCCGTCCACGAGCTTGGTA	Barcode-mapping forward primer round 2 (P7 adapter + i5 index)
AATGATACGGCGACCACCGAGATCTACACCCATGAAGCAAGTGTAAT GGTATGCGTCGGCTAGC	Barcode-mapping reverse primer round 2 (P5 adapter)
CCATGAAGCAAGTGTAATGGTATGCGTCGGCTAGC	Barcode-mapping read 1 primer
GCCTCCGTCCACGAGCTTGGTAGTAATAAGGGCGACC	Barcode-mapping read 2 primer
GGTCGCCCTTATTACTACCAAGCTCGTGGACGGAGGC	Barcode-mapping index 1 primer (i7)
CAGTCAACGAGTCCAGGTAAAGTTACATTCACGCCAGTTGTG	Reverse transcription primer
CAAGCAGAAGACGGCATACGAGAT NNNNNNNN GGCAAGATCGCCGTGTAA	Library amplification forward primer for NGS (P7 adapter + i7 index)
AATGATACGGCGACCACCGAGATCTACAC NNNNNNNN CAGTCAACGAGTCCAGGTAA	Library amplification reverse primer for NGS (P5 adapter + i5 index)
TACCCCCTTTAATCAGATGCGTCGGCTAGC	Read 1 primer
CCGGTATTATTACACGGCGATCTTGCC	Index 1 primer (i7)
GTGaatgtaactTTACCTGGACTCGTTGACTG	Index 2 primer (i5)
