# Supplementary material for: Deep mutational scanning reveals pharmacologically relevant insights into TYK2 signaling and disease
Source: eLife. 2026 Jun 10;15:RP110149. doi: 10.7554/eLife.110149 (PMC13252953; doi:10.7554/eLife.110149)
Supplement: Supplementary file 5. [file elife-110149-supp5.xlsx]

## Sheet: Supplementary File 5
Supplementary File 5: UK Biobank autoimmune disease diagnosis codes.
Endpoint	Case number	UK Biobank diagnosis field IDs
Psoriasis	11,070	131742, 41270: L40
Rheumatoid arthritis	10,652	131848, 131850, 41270: M05, M06
Ulcerative colitis	5,474	131628, 41270: K11
Crohn’s disease	2,777	131626, 41270: K50
Multiple sclerosis	2,097	131042, 41270: G35
Ankylosing spondylitis	1,623	131912, 41270: M45
Systemic lupus erythematosus	743	131894, 41270: M32
Primary biliary cirrhosis	414	41270: K74.3
