# Supplementary material for: Deep mutational scanning reveals pharmacologically relevant insights into TYK2 signaling and disease
Source: eLife. 2026 Jun 10;15:RP110149. doi: 10.7554/eLife.110149 (PMC13252953; doi:10.7554/eLife.110149)
Supplement: Supplementary file 6. — PC, principal component. [file elife-110149-supp6.xlsx]

## Sheet: Supplementary File 6
Supplementary File 6: DMS protein abundance score best fit model coefficients. PC, principal component.
Term	Estimate	Standard error	Z-statistic	p
DMS score	858.37	310.53	2.76	.006
P1104A dosage	-0.28	0.02	-12.82	< .001
sex1	-0.16	0.01	-13.27	< .001
PC1	-29.95	5.78	-5.19	< .001
PC2	-35.61	3.73	-9.55	< .001
PC3	13.35	1.39	9.60	< .001
PC4	-0.86	1.13	-0.76	.447
PC5	-8.94	1.16	-7.73	< .001
PC6	-0.32	0.86	-0.37	.712
PC7	-4.76	0.62	-7.71	< .001
PC8	2.38	0.69	3.45	.001
PC9	2.77	0.48	5.79	< .001
PC10	0.08	0.49	0.16	.870
age	0.15	0.01	25.20	< .001
DMS score × sex	-925.49	421.74	-2.19	.028
