# Supplementary material for: Deep mutational scanning reveals pharmacologically relevant insights into TYK2 signaling and disease
Source: eLife. 2026 Jun 10;15:RP110149. doi: 10.7554/eLife.110149 (PMC13252953; doi:10.7554/eLife.110149)
Supplement: Supplementary file 7. — PC, principal component. [file elife-110149-supp7.xlsx]

## Sheet: Supplementary File 7
Supplementary File 7: DMS IFNa score model fitting and model selection. PC, principal component.
Model Specification	Degrees of freedom	Akaike Information Criterion (AIC)	deltaAIC
Case status ~ PC 1-10 + sex + age + DMS score + P1104A dosage + DMS score *sex	16	205194.6	0.00
Case status ~ PC 1-10 + sex + age + P1104A dosage	14	205195.3	0.7
Case status ~ PC 1-10 + sex + age + DMS score + P1104A dosage + DMS score *sex + P1104A dosage *sex	17	205196.2	1.6
Case status ~ PC 1-10 + sex + age + P1104A dosage + P1104A dosage *sex	15	205196.9	2.3
Case status ~ PC 1-10 + sex + age + DMS score + P1104A dosage	15	205197.3	2.7
Case status ~ PC 1-10 + sex + age + DMS score + P1104A dosage + P1104A dosage *sex	16	205198.8	4.2
Case status ~ PC 1-10 + sex + age + DMS score + DMS score *sex	15	205369.1	174.5
Case status ~ PC 1-10 + sex + age (NULL model)	13	205369.8	175.2
Case status ~ PC 1-10 + sex + age + DMS score	14	205371.8	177.2
