# Supplementary material for: Deep mutational scanning reveals pharmacologically relevant insights into TYK2 signaling and disease
Source: eLife. 2026 Jun 10;15:RP110149. doi: 10.7554/eLife.110149 (PMC13252953; doi:10.7554/eLife.110149)
Supplement: Supplementary file 8. — PC, principal component. [file elife-110149-supp8.xlsx]

## Sheet: Supplementary File 8
Supplementary File 8: DMS IFNa score best fit model coefficients. PC, principal component.
Term	Estimate	Standard error	Z-statistic	p
DMS score	353.68	238.75	1.48	.139
P1104A dosage	-0.28	0.02	-12.81	< .001
sex	-0.16	0.01	-13.20	< .001
PC1	-29.91	5.77	-5.18	< .001
PC2	-35.58	3.73	-9.54	< .001
PC3	13.35	1.39	9.61	< .001
PC4	-0.86	1.13	-0.76	.446
PC5	-8.94	1.16	-7.73	< .001
PC6	-0.33	0.86	-0.38	.705
PC7	-4.74	0.62	-7.68	< .001
PC8	2.39	0.69	3.46	.001
PC9	2.77	0.48	5.78	< .001
PC10	0.08	0.49	0.16	.871
age	0.15	0.01	25.19	< .001
DMS score × sex	-774.24	356.54	-2.17	.030
